# Supplementary material for: Transcriptomic analysis of monocytes from HIV-positive men on antiretroviral therapy reveals effects of tobacco smoking on interferon and stress response systems associated with depressive symptoms
Source: PubMed Central journal article supplement (PMC6883692; doi:10.1186/s40246-019-0247-x), 2019-11-28
Supplement: 40246_2019_247_MOESM1_ESM.pdf [file 40246_2019_247_MOESM1_ESM.pdf]

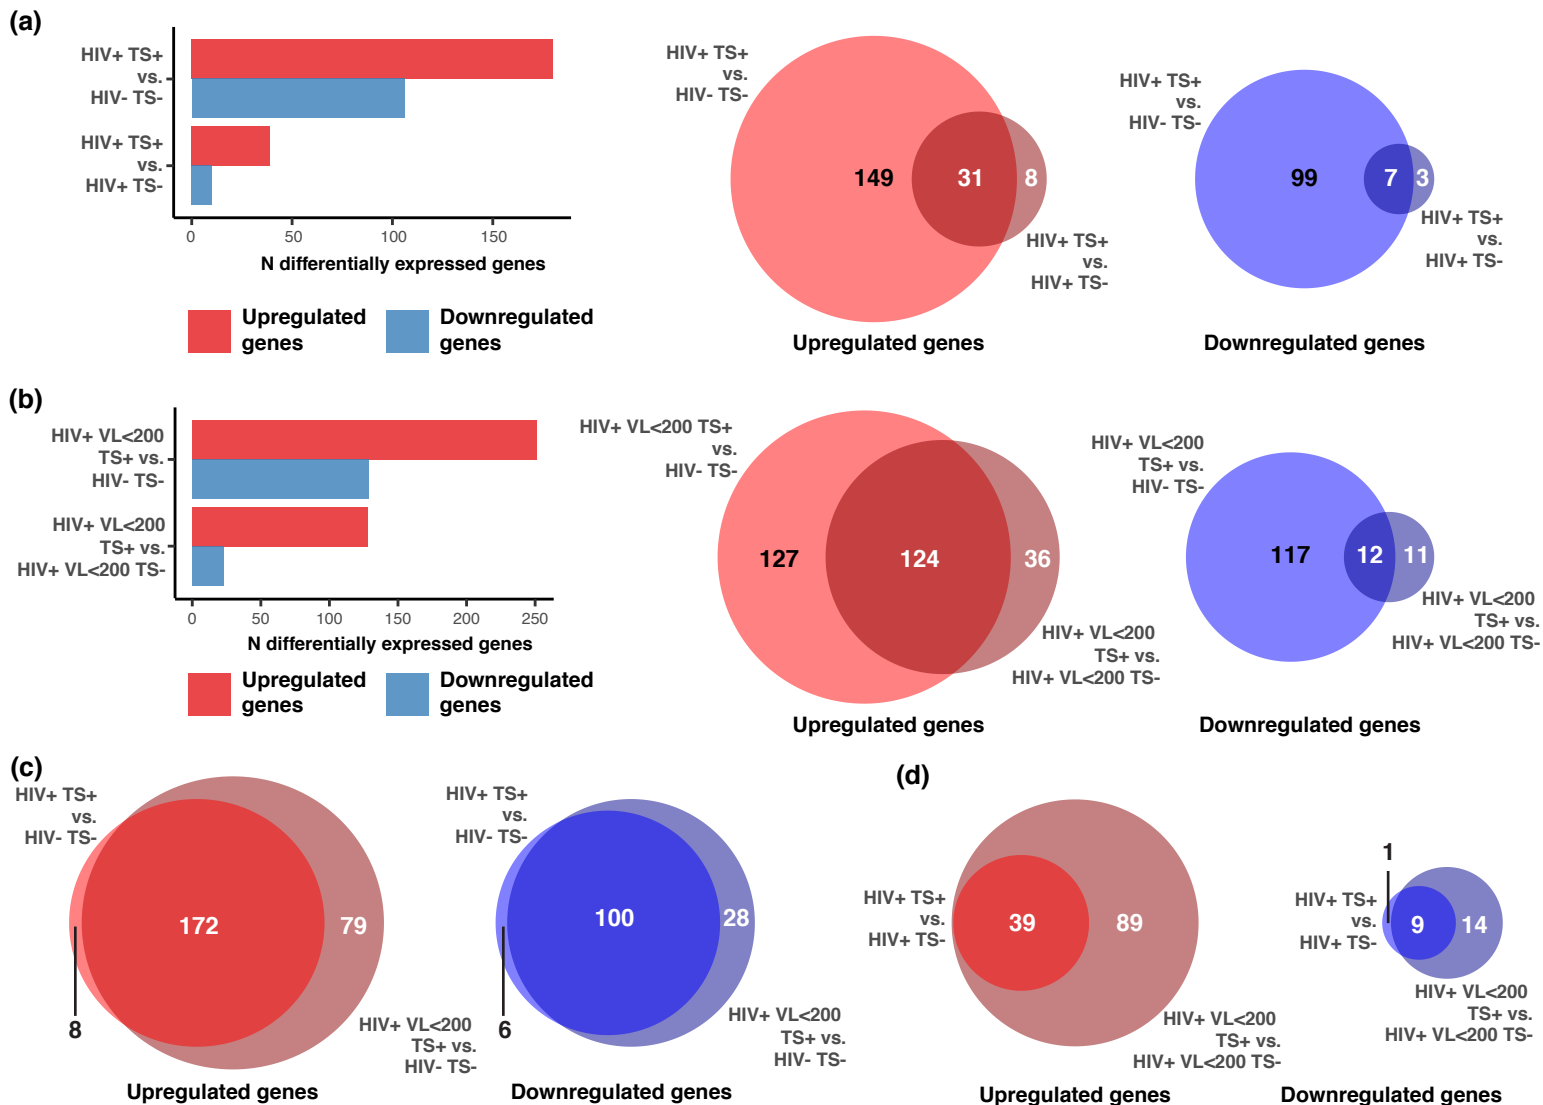

**Figure S1. Overview and comparison of differentially expressed gene sets.** (a) Number of differentially expressed genes from models contrasting HIV+ smokers vs. HIV- and HIV+ non-smokers and Venn diagrams of overlapping up- and down-regulated gene sets; (b) Number of differentially expressed genes from models contrasting HIV+ smokers vs. HIV- and HIV+ non-smokers in sensitivity analyses excluding HIV+ participants with HIV viral load >200 and Venn diagrams of overlapping up- and down-regulated gene sets; (c) Venn diagrams comparing sets of up- and down-regulated genes in full cohort analyses vs. HIV viral load >200 excluded cohort, with arrays from HIV- non-smokers as the reference; and (d) Venn diagrams comparing sets of up- and down-regulated genes in full cohort analyses vs. HIV viral load >200 excluded cohort, with HIV+ nonsmokers as the reference. Genes with FDR-adjusted  $p$  value  $<0.15$ , absolute  $\log_2$  FC  $>0.25$  were deemed differentially expressed for all comparisons.

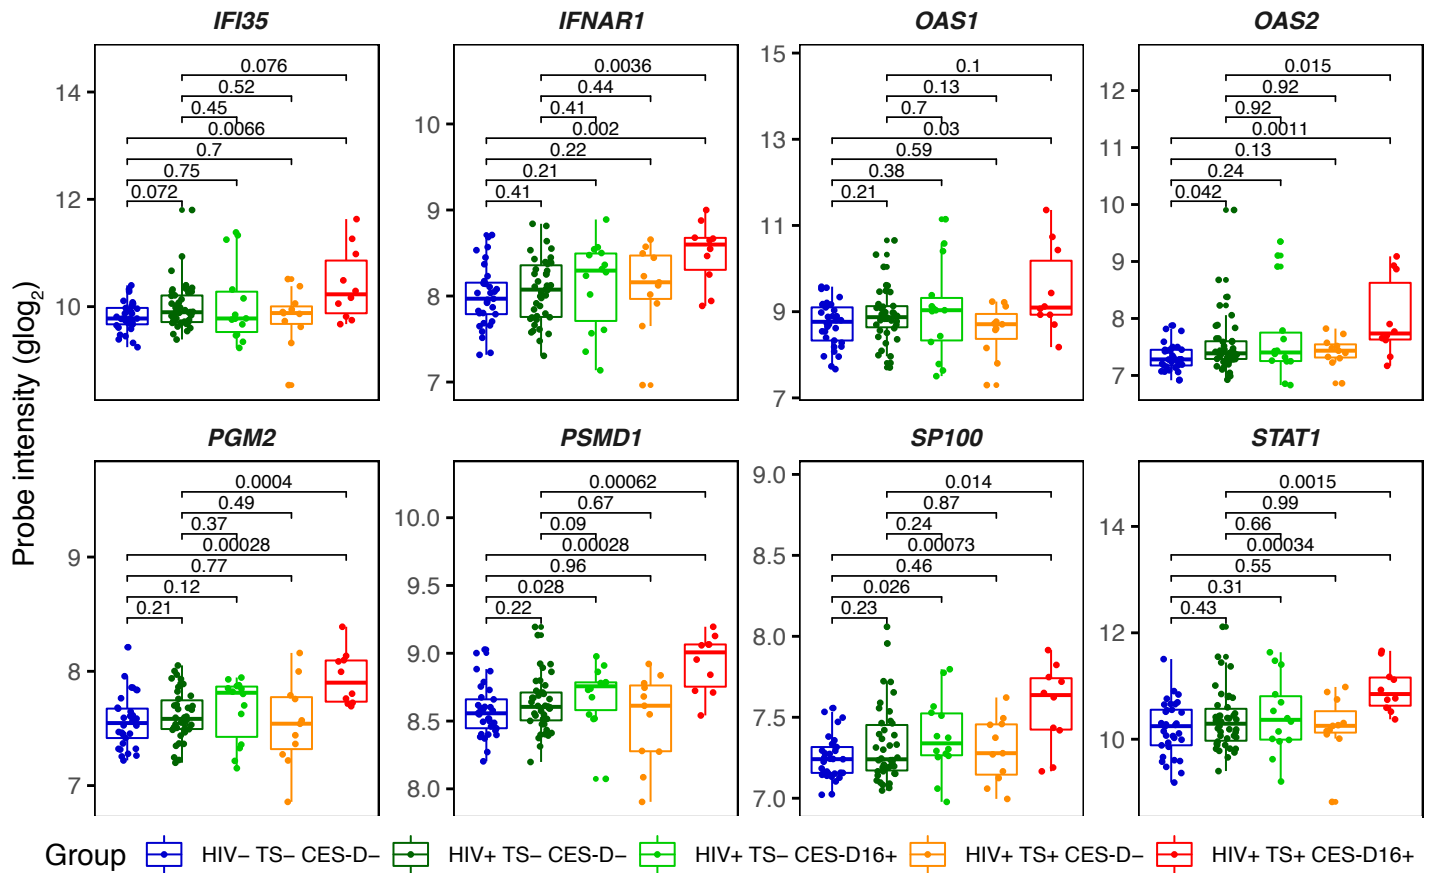

**Figure S2. Expression levels of genes associated with increased depressive symptoms stratified by HIV status, tobacco smoking, and CES-D score  $\geq 16$ .** Boxplots of normalized expression levels for genes associated with CES-D  $\geq 16$  in multivariate logistic regression models (Table 2). Values from five HIV- participants with CES-D  $\geq 16$  were excluded from plots for clarity. Horizontal bars denote medians, boxes span IQRs, whiskers extend to 1.5 x IQR. Dots denote expression values from individual arrays. Groups were compared using the Wilcoxon rank-sum test. Abbreviations: CES-D, Center for Epidemiological Studies Depression Scale; CES-D-, CES-D score  $< 16$ ; CES-D16+, CES-D score  $\geq 16$ ; IQR, interquartile range; TS+, tobacco smoker; TS-, non-smoker.

### Immune/interferon response

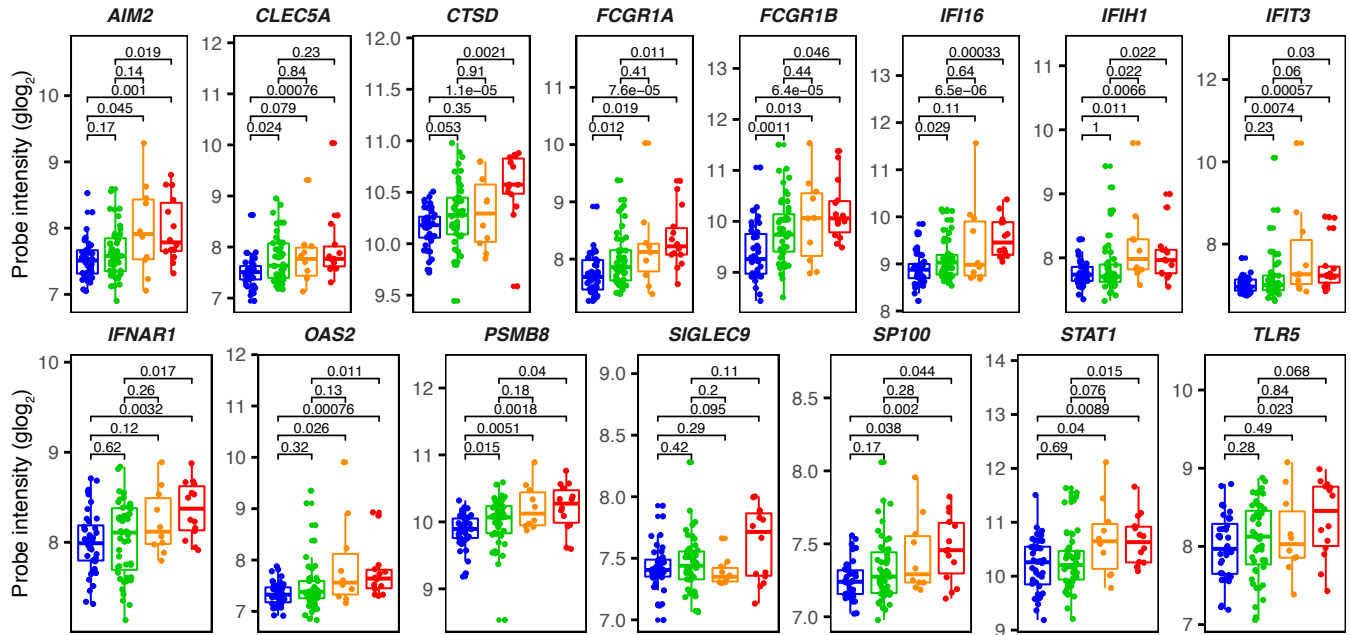

### Stress/chemical response

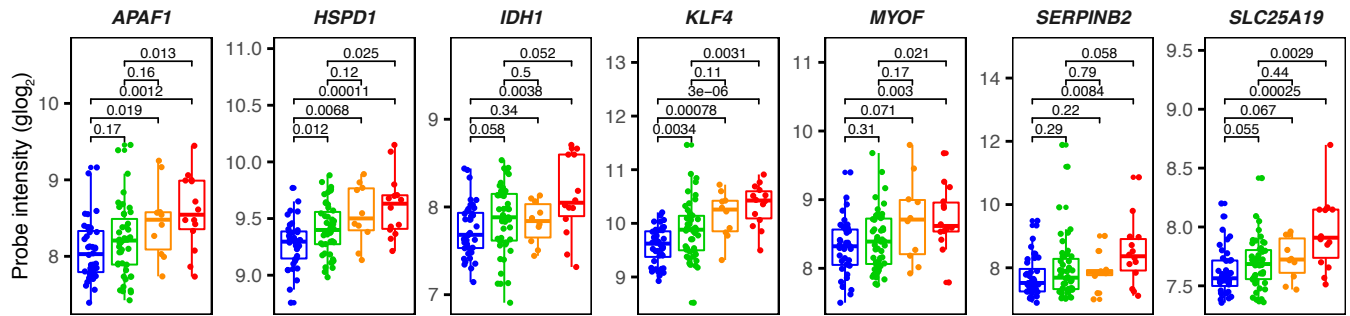

### Mitochondrion

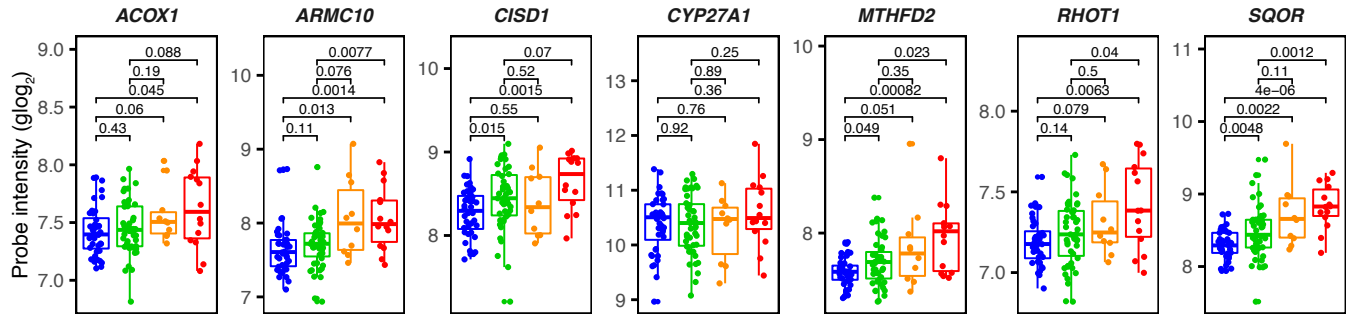

### Smoking-associated

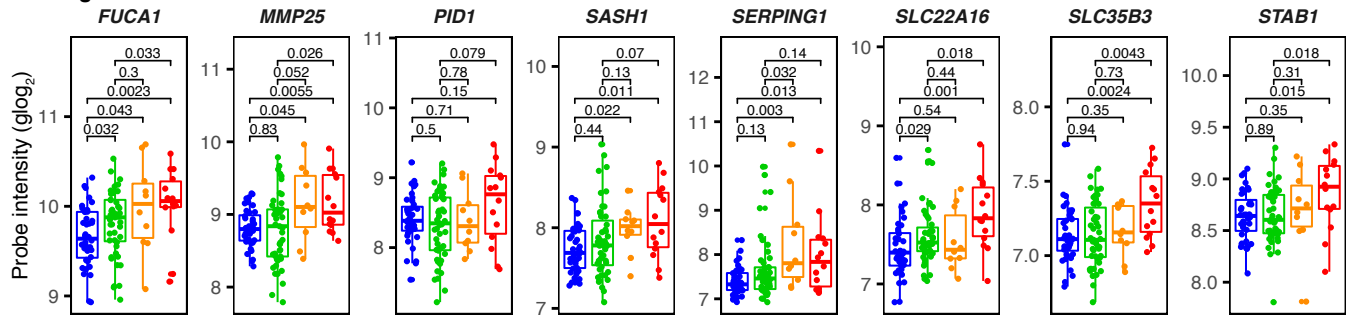

Group ■ HIV- MJ-TS- ■ HIV+ MJ-TS- ■ HIV+ MJ+TS- ■ HIV+ MJ+TS+

**Figure S3. Expression levels of selected immune/interferon response, stress/chemical response, mitochondrion, and smoking-associated genes stratified by HIV status and marijuana or tobacco smoking.** Boxplots of normalized gene expression levels for selected genes in Figure 4. Horizontal bars denote medians, boxes span IQRs, whiskers extend to 1.5 x IQR. Dots denote expression values from individual arrays. Groups were compared using the Wilcoxon rank-sum test. Abbreviations: IQR, interquartile range; MJ+, marijuana smoker; MJ-, marijuana non-smoker; TS+, tobacco smoker; TS-, non-smoker.

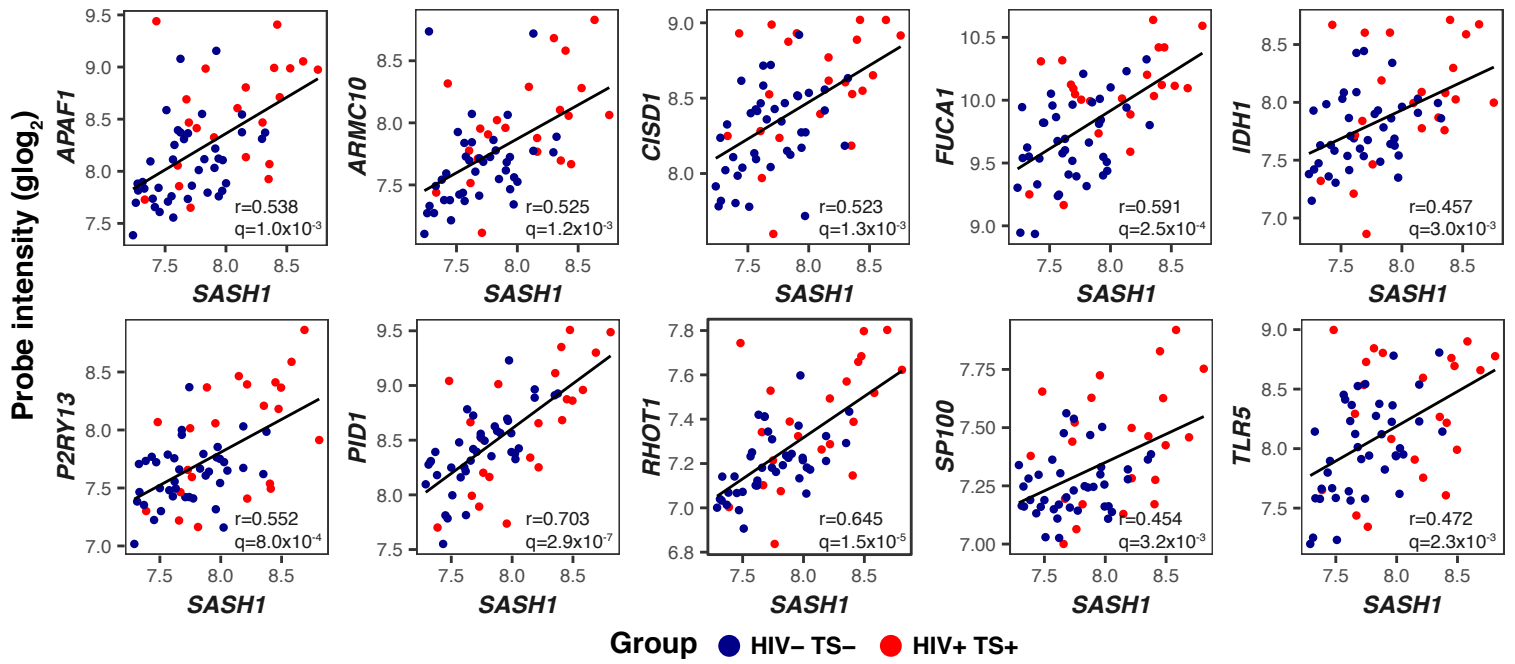

**Figure S4. Genes with high correlation to known smoking-associated gene *SASH1* in HIV+ smokers and HIV- non-smokers.** Correlation analyses of eight DE genes in HIV+ smokers vs. HIV- non-smokers showing significant correlation with *SASH1* expression. Probe intensities were normalized and generalized-log<sub>2</sub> transformed using the R/Bioconductor *vsn* package. Dots denote probe intensities from individual arrays, *r* denotes Pearson's correlation coefficient, *q* denotes FDR-adjusted *p* value. Abbreviations: FDR, false-discovery rate; TS+, tobacco smoker; TS-, non-smoker.

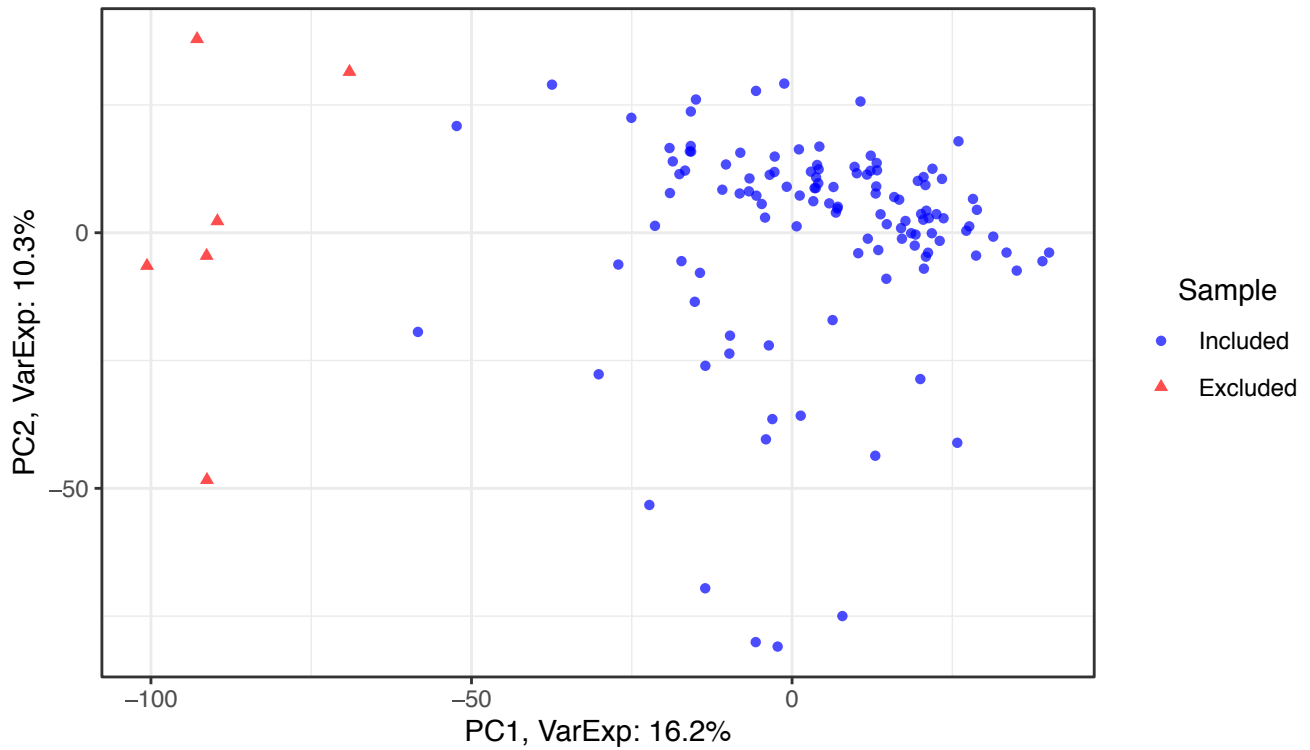

**Figure S5. Identification of outlier samples by principal component analysis (PCA).** Scatter plot of the first two principal components calculated from the set of 24,941 normalized probe intensities ( $n=125$  microarrays). Outlier samples removed from subsequent differential expression analyses are marked as red triangles ( $n=6$ ). Abbreviations: PC, principal component.
